# Supplementary material for: In Pursuit of New Imprinting Syndromes by Epimutation Screening in Idiopathic Neurodevelopmental Disorder Patients
Source: Hindawi journal article supplement (doi:10.1155/2015/341986), 2015-01-01
Supplement: f1 [file 341986.f1.pdf]

Supplementary table 1: Material and method used in the methylation test.

| Reagents                             |                    | Amount       |            |                        |        | PCR program                                                                                                 |  |
|--------------------------------------|--------------------|--------------|------------|------------------------|--------|-------------------------------------------------------------------------------------------------------------|--|
| H <sub>2</sub> O                     |                    | 9 µl         |            |                        |        |                                                                                                             |  |
| Master Mix 2X                        |                    | 12 µl (1X)   |            |                        |        |                                                                                                             |  |
| DMSO                                 |                    | 1.25 µl (5%) |            |                        |        |                                                                                                             |  |
|                                      |                    |              |            |                        |        |                                                                                                             |  |
| Primers                              | SNRPN_F* (50uM)    | 312 nM       |            | AGGTCATTCCGGTGAGGGAGG  | 490 bp | 37°C X 60 min<br>94°C X 1 min<br>96°C X 40 s<br>59°C X 1 min<br>72°C X 1 min<br>72°C X 7 min<br>X 28 cycles |  |
|                                      | SNRPN_R (50uM)     | 312 nM       |            | ACCGCAGACACCCGCAATAGG  |        |                                                                                                             |  |
|                                      | H19_F* (50uM)      | 250 nM       |            | GGCAACATGCGGTCTTCAGAC  | 420 bp |                                                                                                             |  |
|                                      | H19_R (50uM)       | 250 nM       |            | TCCGGAGACAGGGCTGAGCA   |        |                                                                                                             |  |
|                                      | MEG3_F* (50uM)     | 250 nM       |            | TCCTGACATGTTGCAGTCTTG  | 386 bp |                                                                                                             |  |
|                                      | MEG3_R (50uM)      | 250 nM       |            | CTCCACAACACCCGAAGCCAC  |        |                                                                                                             |  |
|                                      | KCNQ1OT1_F* (50uM) | 187 nM       |            | CCTGTCATTGGCCGAAAGAGTC | 366 bp |                                                                                                             |  |
|                                      | KCNQ1OT1_R (50uM)  | 187 nM       |            | GTTCGAGGGTCGCTGCAGC    |        |                                                                                                             |  |
| HpaII <sup>I</sup> /H <sub>2</sub> O |                    | 10 U         | 1 µl       |                        |        |                                                                                                             |  |
| DNA                                  |                    | 50 ng        |            |                        |        |                                                                                                             |  |
| TOTAL                                |                    | 25 µl        |            |                        |        |                                                                                                             |  |
|                                      |                    | Digested     | Undigested |                        |        |                                                                                                             |  |

\* labelled with FAM

<sup>1</sup> New Englad Biolabs

F: forward; R: reverse

**Supplementary Table 2:** Segregation microsatellite markers used to evaluate a uniparental disomy as the cause of the methylation alteration. PCR reagents and programs, as well as sequence and size of each amplicon used in the PCR reactions. All reagents are from Roche except from Taq polymerase that is from

| Marker<br>(location)               | Sequence                                             | PCR reagents                                                                                                                               | PCR program                                                                                                                        | Size (bp) | Chr |
|------------------------------------|------------------------------------------------------|--------------------------------------------------------------------------------------------------------------------------------------------|------------------------------------------------------------------------------------------------------------------------------------|-----------|-----|
| D11S1984<br>(1.57Mb)               | GGGTGACAGAGCAAAATTCT<br>ACACCTGGATCTTGGACTCA         | 1µl gDNA (100ng/µl)<br>1X PCR reaction Buffer<br>2.5U Taq polimerase<br>480µM dNTPs<br>1µM Primer F<br>1µM Primer R<br>25µl V <sub>f</sub> | 3min 94°C<br>30s 94°C<br>30s 60°C-0.5°C/cy } 10 cycles<br>30s 72°C<br>30s 94°C<br>30s 55°C<br>30s 72°C<br>7min 72°C<br>} 20 cycles | 170-202   | 11  |
| D11S2362<br>(4.91Mb)               | TGGACTATAGGACCCCCTTC<br>GAGAACAGCCTGTCACACCT         |                                                                                                                                            |                                                                                                                                    | 209-230   |     |
| D11S1999<br>(10.72Mb)              | TACATGGCAGCAGGCATATA<br>GAGTAAACAAGATTGCTAGATAGGC    |                                                                                                                                            |                                                                                                                                    | 109-137   |     |
| D14S288<br>(44.10Mb)               | AGCTAGACTCTGCCATAAACA<br>TGGAGACAGGAACAACACAC        |                                                                                                                                            |                                                                                                                                    | 189-209   | 14  |
| D14S68<br>(88.63Mb)                | GAGAGGTGGTTTTTCAGTGGT<br>TCAGGGATAGTTGGTGGGTA        |                                                                                                                                            |                                                                                                                                    | 148-172   |     |
| D14S1006<br>(101.18Mb)             | TTCCACAGGGCAAGCAGTA<br>TTCTGGCAAAACCCAACC            |                                                                                                                                            |                                                                                                                                    | 121-155   |     |
| D14S985<br>(101.30Mb)              | CAGTGTGACCTTAAACAAGTCG<br>CCTGTGGGGTAGATACACGA       |                                                                                                                                            |                                                                                                                                    | 118-142   |     |
| D14S72 <sup>1</sup><br>(21.37Mb)   | TGTAAAGTTTTGTACATGGTGTAAT<br>TCCTAACATTCTGCTACCCA    |                                                                                                                                            |                                                                                                                                    | 257-271   |     |
| D14S1023 <sup>1</sup><br>(21.44Mb) | TGCATTTCCCGTAGACATT<br>GACTCTTGTAGTTCTTTGAAGCC       |                                                                                                                                            |                                                                                                                                    | 93-109    |     |
| D14S990 <sup>1</sup><br>(23.59Mb)  | GTCCACTTGGTCATGGAAAC<br>AAGTTGCACTGTGACTGGG          |                                                                                                                                            |                                                                                                                                    | 135-161   |     |
| D15S1035<br>(22.91Mb)              | CACCCCCATGCAGAGTGAG<br>CCAAAGGCCAAGACCTGCC           |                                                                                                                                            |                                                                                                                                    | 175-265   | 15  |
| D15S11<br>(24.09Mb)                | GACATGAACAGAGGTAAATTGGTGG<br>GCTCTCTAAGATCACTGGATAGG |                                                                                                                                            |                                                                                                                                    | 243       |     |
| D15S122<br>(25.68Mb)               | GATAATCATGCCCCCA<br>CCCAGTATCTGGCACGTA               |                                                                                                                                            |                                                                                                                                    | 143-159   |     |
| GABRB3<br>(26.74Mb)                | CTCTTGTTCTGTTGCTTTCAATACAC<br>CACTGTGCTAGTAGATTCACTC |                                                                                                                                            |                                                                                                                                    | 180-200   |     |

<sup>1</sup> Markers used to confirm duplication of patient 5 and the paternal origin of the alteration.

F: forward; R: reverse; V<sub>f</sub>: final volumen
